# Supplementary material for: Alterations in Energy Metabolism, Mitochondrial Function and Redox Homeostasis in GK Diabetic Rat Tissues Treated with Aspirin
Source: Life (Basel). 2022 Jan 12;12(1):104. doi: 10.3390/life12010104 (PMC8780217; doi:10.3390/life12010104)
Supplement: Supplementary file 1 [file life-12-00104-s001.zip › Supplementary material-Quantitation values- western blots-revised.xlsx]

## Sheet: Sheet1
		Densitometry readings/intensity ratios of the bands used to represent Western blots
		Bands were quantified using the Typhoon FLA 9500 system (GE Healthcare, Uppsala, Sweden)
	Table S1. Quantitation values for Western blots for Figure 7
		Liver							Kidney
HO-1								HO-1
GAPDH								GAPDH
		HO-1	GAPDH	Ratio	Normalized				HO-1	GAPDH	Ratio	Normalized
	C	19200000	14300000	1.34266	1.00198			C	14300000	5770000	2.47834	0.999329
	C-ASA	10700000	8700000	1.22989	0.917825			C-ASA	16700000	5660000	2.95053	1.18973
	GK	9040000	8390000	1.07747	0.804084			GK	8060000	5600000	1.43929	0.580357
	GK-ASA	7190000	7130000	1.00842	0.752549			GK-ASA	15000000	8220000	1.82482	0.735814
	Table S2. Quantitation values for Western blots for Figure 8A
		Liver							Kidney
p-Akt								p-Akt
Akt								Akt
		pAkt	Akt	Ratio	Normalized				pAkt	Akt	Ratio	Normalized
	C	20700	4240000	0.00488208	1.00043			C	35500	1210000	0.0293388	0.999961
	C-ASA	17200	3890000	0.00442159	0.906064			C-ASA	24300	1550000	0.0156774	0.534336
	GK	7440	3820000	0.00194764	0.399107			GK	29700	1330000	0.0223308	0.761105
	GK-ASA	15400	4640000	0.00331897	0.680116			GK-ASA	30000	2280000	0.0131579	0.448463
	Table S3. Quantitation values for Western blots for Figure 8B
		Liver							Kidney
Glut-4								Glut-4
GAPDH								GAPDH
		Glut-4	GAPDH	Ratio	Normalized				Glut-4	GAPDH	Ratio	Normalized
	C	79000	5990000	0.0131886	0.99914			C	113000	6020000	0.0187708	0.999987
	C-ASA	53000	7150000	0.00741259	0.56156			C-ASA	74300	4700000	0.0158085	0.842177
	GK	33700	6770000	0.00497784	0.377109			GK	59000	5560000	0.0106115	0.565314
	GK-ASA	56500	6100000	0.0092623	0.701689			GK-ASA	65000	4510000	0.0144124	0.767802
	Table S4 Quantitation values for Western blots for Figure 9
		Liver							Kidney
p-JNK								p-JNK
JNK								JNK
		Quantitation of top bands							Quantitation of top bands
		pJNK	JNK	Ratio	Normalized				pJNK	JNK	Ratio	Normalized
	C	1090000	4190000	0.260143	1.00055			C	59400	105000	0.565714	0.999495
	C-ASA	804000	5420000	0.148339	0.706378			C-ASA	34500	124000	0.278226	0.491565
	GK	967000	7500000	0.128933	0.613968			GK	57100	115000	0.496522	0.877247
	GK-ASA	830000	5980000	0.138796	0.660933			GK-ASA	71800	187000	0.383957	0.67837
